# Supplementary material for: Ghrelin-responsive mediobasal hypothalamic neurons mediate exercise-associated food intake and exercise endurance
Source: JCI journal article supplement (doi:10.1172/jci.insight.172549), 2023-12-21
Supplement: sd1 [file 1]

## **Supplemental Methods**

### **Ghrelin induced food intake studies**

Mice were first handled for 3 days to acclimate them to the handling needed at the time of injections. Food was withdrawn from the cages during the light cycle (at ~10 AM) for 2 h, after which CNO (0.3 mg/kg BW i.p.) was delivered to all of the mice. One hour after CNO administration, the mice were administered ghrelin (1 mg/kg BW s.c., SP-GHRL-1, Innovagen, Lund, Sweden), and standard chow (Teklad Global Diet [2916]) was re-introduced into the cage. Food intake was measured at 2 h post-ghrelin administration and mice were immediately anesthetized with chloral hydrate (500 mg/kg BW i.p.) and transcardially perfused.

### **Oral glucose tolerance test (oGTT)**

Food was removed from the home cage 3 h after the start of the light cycle for a 6 h duration. During the 5<sup>th</sup> hour of fasting (at 3 PM), mice were administered CNO (0.3 mg/kg BW i.p.) to inhibit the GHSR-expressing neurons infected with hM4Di. After 1h, D-glucose (2 mg/kg BW; Sigma-Aldrich) was administered by oral gavage and blood glucose levels were determined at 0, 30, 60, 90 and 120 min from blood obtained from tail snips, as above.

### **Determination of plasma ghrelin and LEAP2**

Tail vein blood was collected into two separate EDTA-coated Microvette® CB300 collection tubes on ice. The tubes contained one of the following protease inhibitors: p-hydroxymercuribenzoic acid (Sigma-Aldrich; final concentration 1 mM; for ghrelin measurement) or aprotinin (Sigma-Aldrich; final concentration 250 KIU/mL; for LEAP2 measurement). The samples were immediately centrifuged at 4°C at 1,500 g x 15 min. For ghrelin stabilization, HCl was added (final concentration 0.1 N). Ghrelin concentrations were determined with an acyl-ghrelin ELISA kit (EMD Millipore, Billerica, MD; Catalog #EZRGRA-90K) after plasma samples were diluted 4X in assay buffer. LEAP2 concentrations were determined with a LEAP2 (37-76) (Mouse) ELISA kit (Phoenix Pharmaceuticals, Inc., Burlingame, CA, Catalog # EK-075-40) after plasma samples were diluted 4X in assay buffer. Endpoint calorimetric measurements were performed using a BioTek PowerWave XS Microplate spectrophotometer and KC4 junior software (Winooski, VT).

## Supplemental Figures

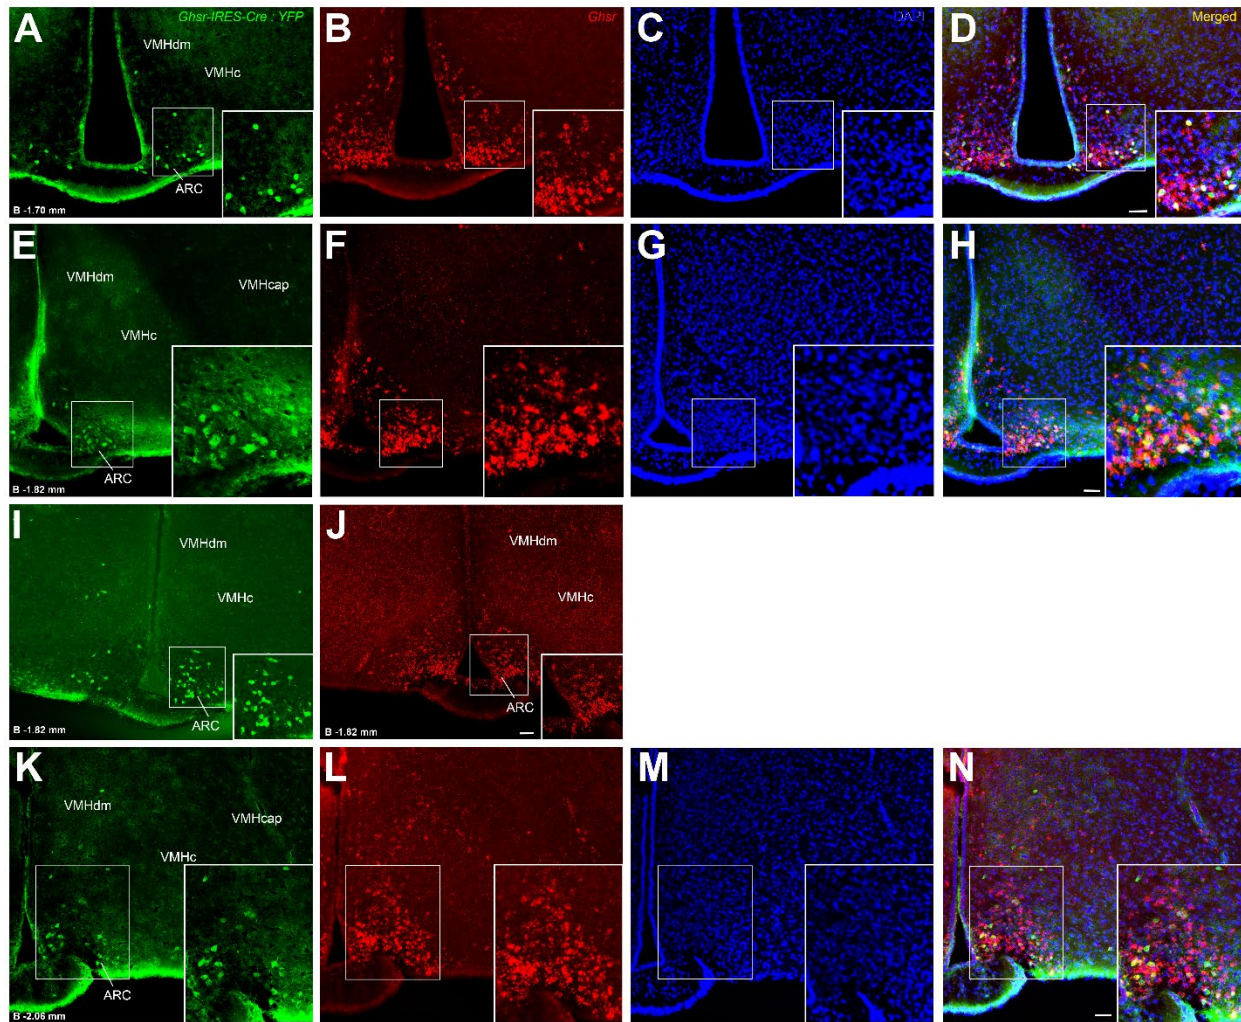

Supplemental Figure 1

**Supplemental Figure 1. Further validation of the expected Cre recombinase activity pattern within *Ghnr-IRES-Cre* mice X *ROSA26-YFP* reporter mice.** A-H and K-N, Low magnification fluorescence photomicrographs of two representative mice (A-D, “mouse 1”; E-H and K-N, “mouse 2”) showing YFP-immunoreactive cell bodies (green) and *Ghnr* mRNA expression using RNAscope *in situ* hybridization histochemistry (red) and their co-localization (yellow) in coronal MBH sections (a total of n=5 mice were assessed, but only 2 are shown here). I-J, Low magnification fluorescence photomicrographs showing YFP-immunoreactive cell bodies (green) and *Ghnr* mRNA expression (red) in adjacent coronal MBH sections of “mouse 2” (the sections in I and J are adjacent to each other and to the section depicted in E-H). Scale bars = 50 μm in A-N. Approximate distance of each coronal section from bregma (B) is indicated in the lower left corner of each panel. ARC - Arcuate nucleus; VMHc - Ventromedial hypothalamic nucleus, central aspect; VMHcap - Ventromedial hypothalamic nucleus, capsular region; VMHdm - ventromedial hypothalamic nucleus, dorsomedial aspect.



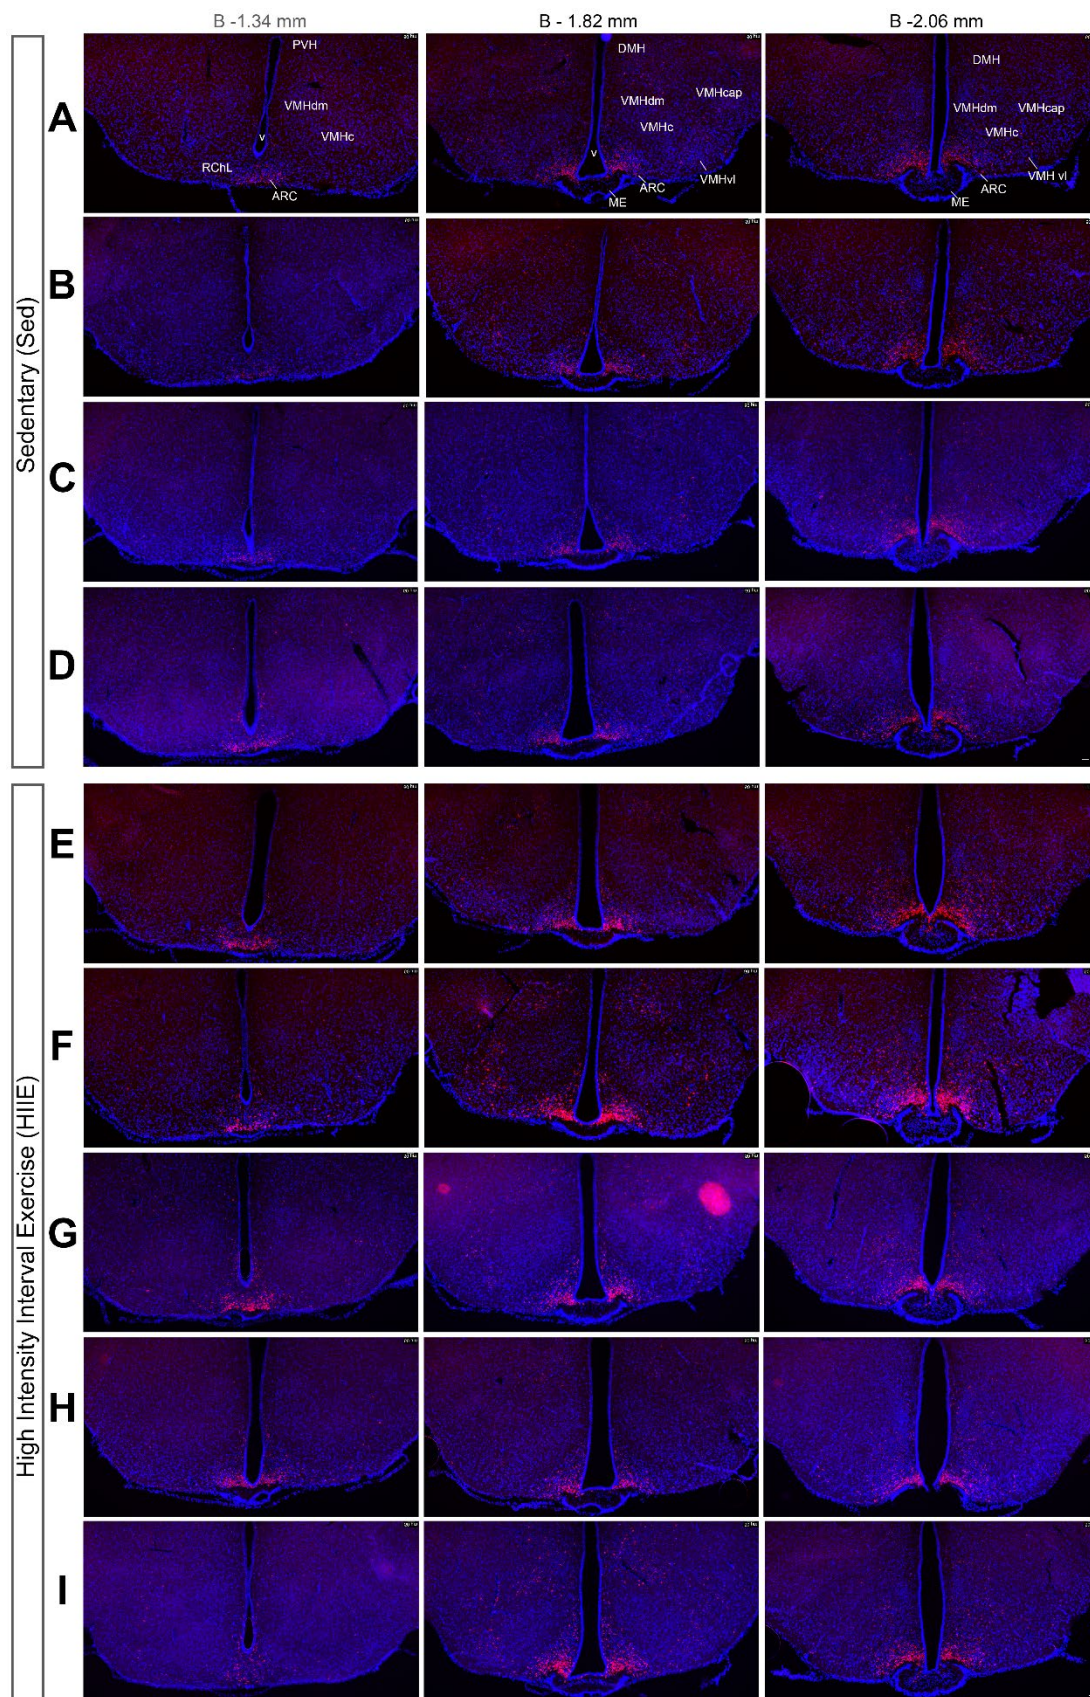

Supplemental Figure 2

**Supplemental Figure 2. Hypothalamic *Ghsr* mRNA expression in sedentary C57BL/6N mice vs. C57BL/6N mice exposed to HIE.** A-I, Low magnification fluorescence photomicrographs showing *Ghsr* mRNA expression (red), as determined using RNAscope *in situ* hybridization histochemistry in coronal MBH sections of sedentary mice (A-D) and HIE-exposed mice (E-I). DAPI (blue) is used as counterstaining. The approximate distances of each coronal section from bregma (B) are indicated at the top of each panel. Scale bars = 50  $\mu$ m in A-I. v - third ventricle; ARC - Arcuate nucleus; DMH - Dorsomedial hypothalamic nucleus; ME - median eminence; PVH - Paraventricular hypothalamic nucleus; RChL - Retrochiasmatic area, lateral part; VMHc - Ventromedial hypothalamic nucleus, central aspect; VMHcap - Ventromedial hypothalamic nucleus, capsular region; VMHdm - ventromedial hypothalamic nucleus, dorsomedial aspect; VMHvl - Ventromedial hypothalamic nucleus, ventrolateral aspect.



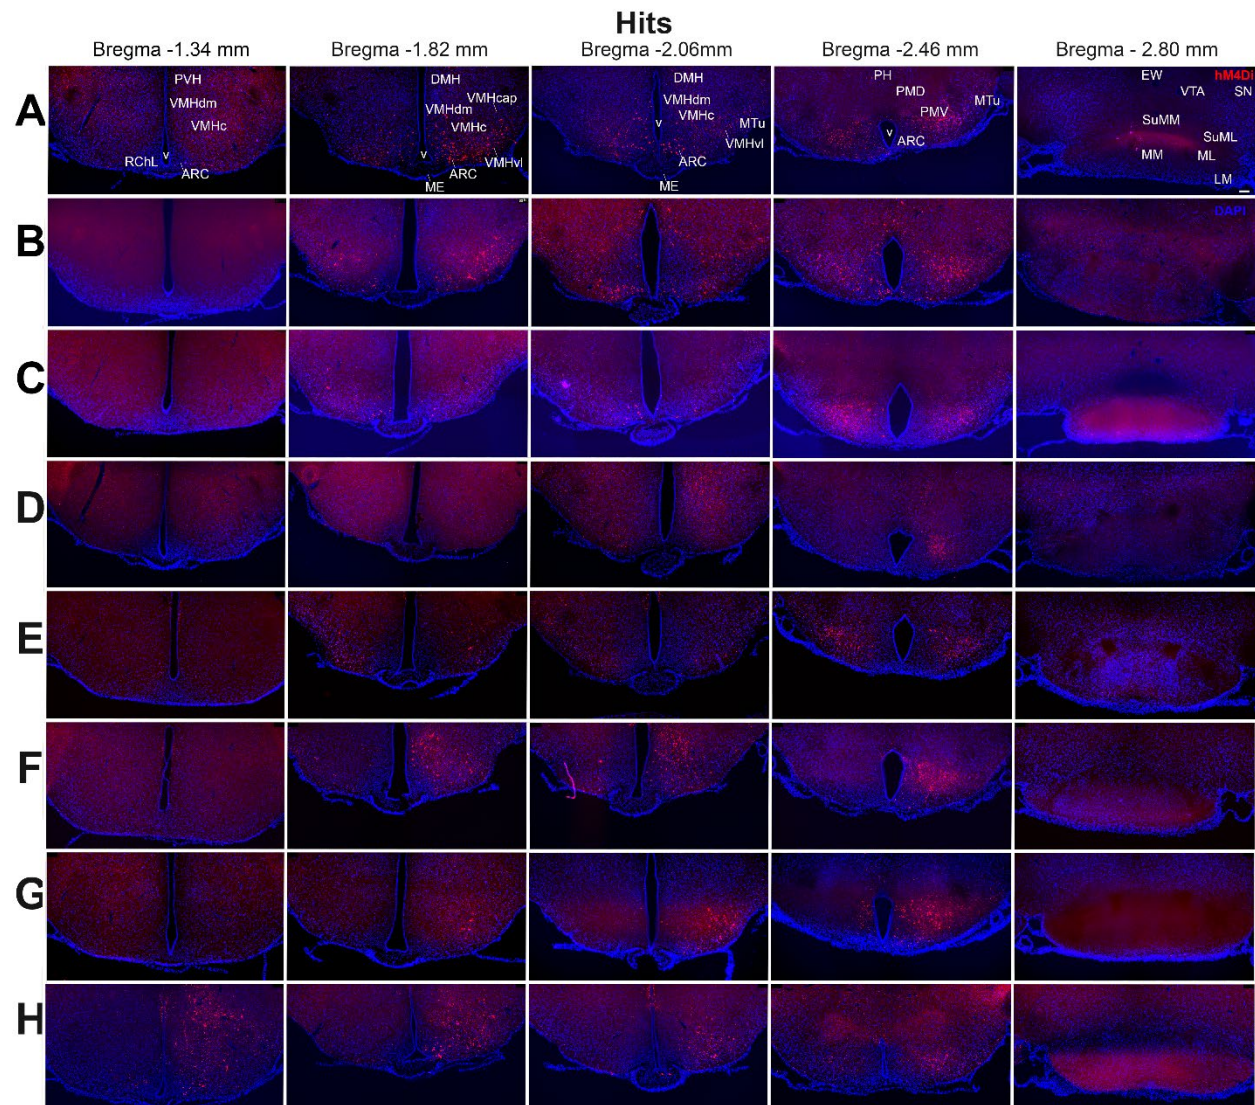

Supplemental Figure 3

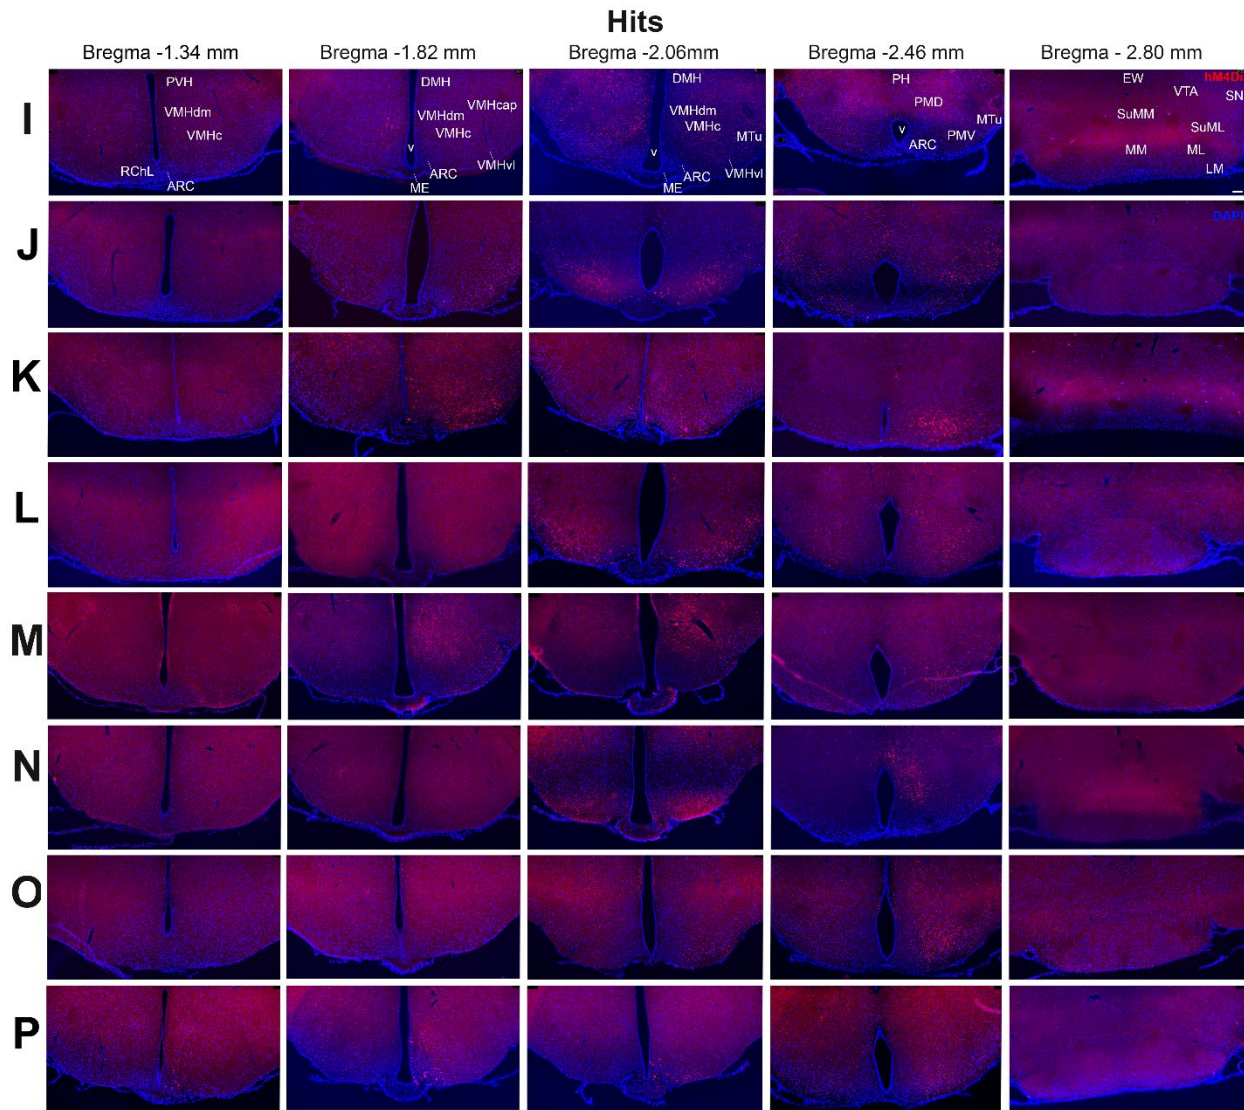

**Supplemental Figure 3**

**Supplemental Figure 3. mCherry expression in AAV-hSyn-DIO-hM4D(Gi)-mCherry virus (hM4Di)-injected *Ghsr-IRES-Cre* “hits”.** Fluorescence photomicrographs showing Cre-dependent mCherry expression (red) in GHSR-expressing neurons within five coronal brain sections extending from approximately -1.34 mm to -2.80 mm from Bregma. Each of the n=16 “hits” is represented by a row (A-P). Qualitative assessment of the regions with expression and the amounts of expression for each “hit” is also included in Table 1. Scale bar in row A = 100  $\mu$ m and applies to all the panels in rows A-P. DAPI counterstaining is shown in blue. v - third ventricle; ARC - Arcuate nucleus; DMH - Dorsomedial hypothalamic nucleus; EW - Edinger-Westphal nucleus; LM - lateral mammillary nucleus; ME- median eminence; MM - medial mammillary nucleus, medial part; ML - medial mammillary nucleus, lateral part; MTu - median tuberal nucleus; PH - posterior hypothalamic area; PMD - Premammillary nucleus, dorsal part; PMV -Premammillary nucleus, ventral part; PVH - Paraventricular hypothalamic nucleus; RChL - Retrochiasmatic area, lateral part; SN - Substantia nigra; SuML - Supramammillary nucleus, lateral part; SuMM - Supramammillary nucleus, medial part; VMHc - Ventromedial hypothalamic nucleus, central aspect; VMHcap - Ventromedial hypothalamic nucleus, capsular region; VMHdm - ventromedial hypothalamic nucleus, dorsomedial aspect; VMHvl - Ventromedial hypothalamic nucleus, ventrolateral aspect; VTA - Ventral tegmental area.



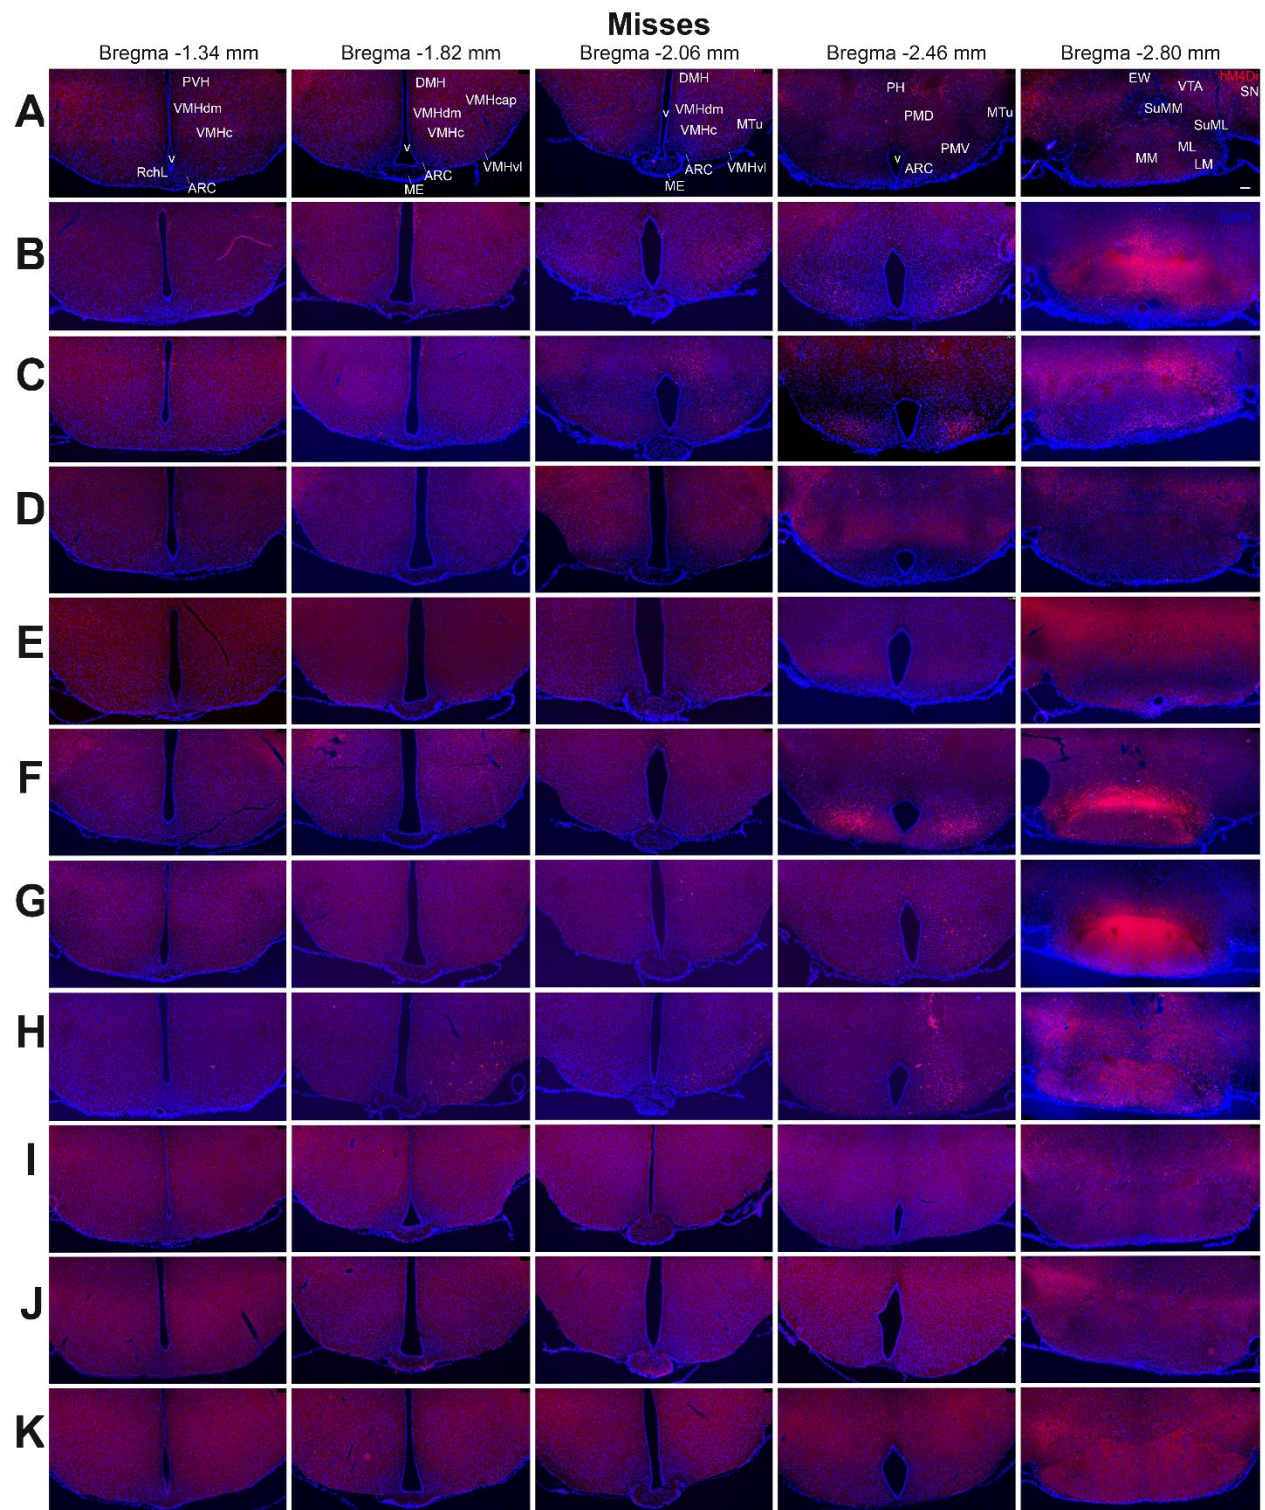

Supplemental Figure 4

**Supplemental Figure 4. mCherry expression in AAV-hSyn-DIO-hM4D(Gi)-mCherry virus (hM4Di)-injected *Ghsr-IRES-Cre* “misses”.** Fluorescence photomicrographs showing Cre-dependent mCherry expression (red) in GHSR-expressing neurons within five coronal brain sections extending from approximately -1.34 mm to -2.80 mm from Bregma. Each of the n=11 “misses” is represented by a row (**A-K**). Qualitative assessment of the regions with expression and the amounts of expression for each “hit” is also included in Table 1. Scale bar in row **A** = 100  $\mu$ m and applies to all the panels in rows **A-K**. DAPI counterstaining is shown in blue. v - third ventricle; ARC - Arcuate nucleus; DMH - Dorsomedial hypothalamic nucleus; EW - Edinger-Westphal nucleus; LM - lateral mammillary nucleus; ME- median eminence; MM - medial mammillary nucleus, medial part; ML - medial mammillary nucleus, lateral part; MTu - median tuberal nucleus; PH - posterior hypothalamic area; PMD - Premammillary nucleus, dorsal part; PMV -Premammillary nucleus, ventral part; PVH - Paraventricular hypothalamic nucleus; RChL - Retrochiasmatic area, lateral part; SN - Substantia nigra; SuML - Supramammillary nucleus, lateral part; SuMM - Supramammillary nucleus, medial part; VMHc - Ventromedial hypothalamic nucleus, central aspect; VMHcap - Ventromedial hypothalamic nucleus, capsular region; VMHdm - ventromedial hypothalamic nucleus, dorsomedial aspect; VMHvl - Ventromedial hypothalamic nucleus, ventrolateral aspect; VTA - Ventral tegmental area.



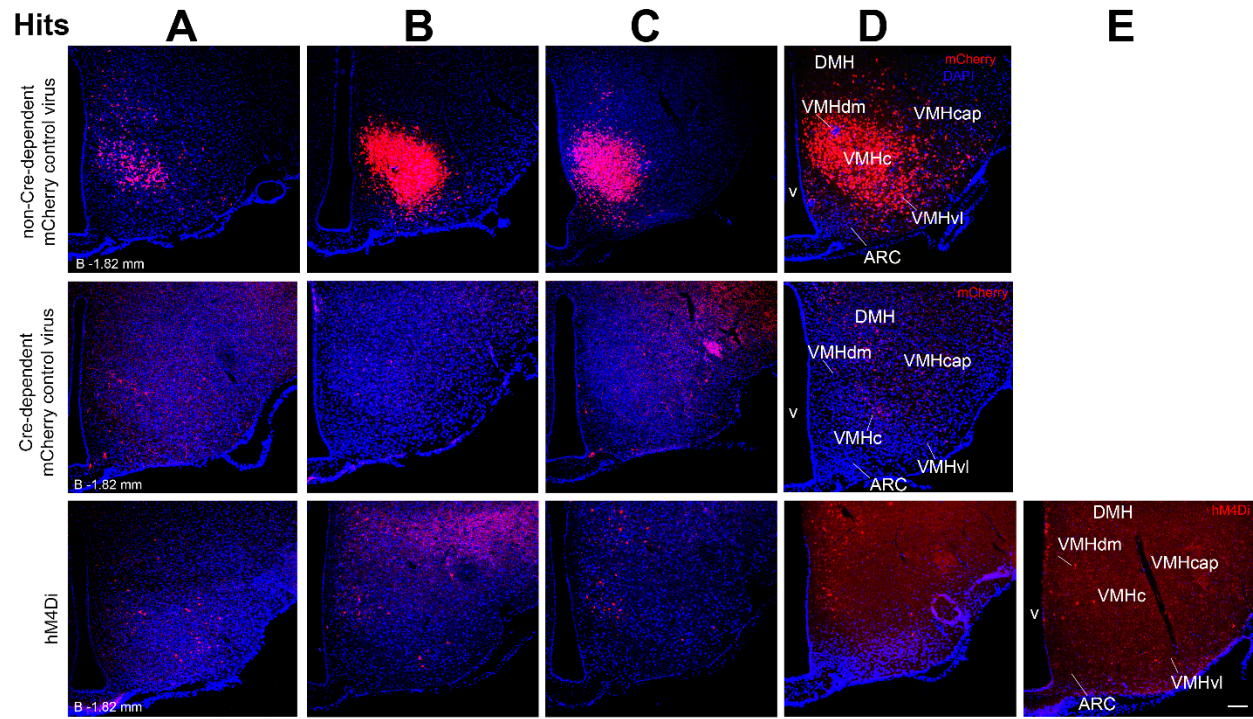

**Supplemental Figure 5**

**Supplemental Figure 5. mCherry expression in the MBH of representative *Ghnr-IRES-Cre* “hits” injected with hM4Di or one of two control viruses and used to generate data in Fig. 5.** Confocal photomicrographs showing mCherry expression (red) within the MBH of coronal sections located approximately -1.82 mm Bregma (B) from **top row**, each of four (**A-D**) “hits” targeted with “non-Cre-dependent mCherry control virus” (AAV-hSyn-mCherry), **middle row**, each of four (**A-D**) “hits” targeted with “Cre-dependent mCherry control virus” (AAV-hSyn-DIO-mCherry), and **bottom row**, each of five (**A-E**) “hits” targeted with hM4Di (AAV-hSyn-DIO-hM4D(Gi)-mCherry). Scale bar in **E** = 100 μm and applies to all the panels. v - third ventricle; ARC - Arcuate nucleus; VMHc - Ventromedial hypothalamic nucleus, central aspect; VMHcap - Ventromedial hypothalamic nucleus, capsular region; VMHdm - ventromedial hypothalamic nucleus, dorsomedial aspect; VMHvl - Ventromedial hypothalamic nucleus, ventrolateral aspect.

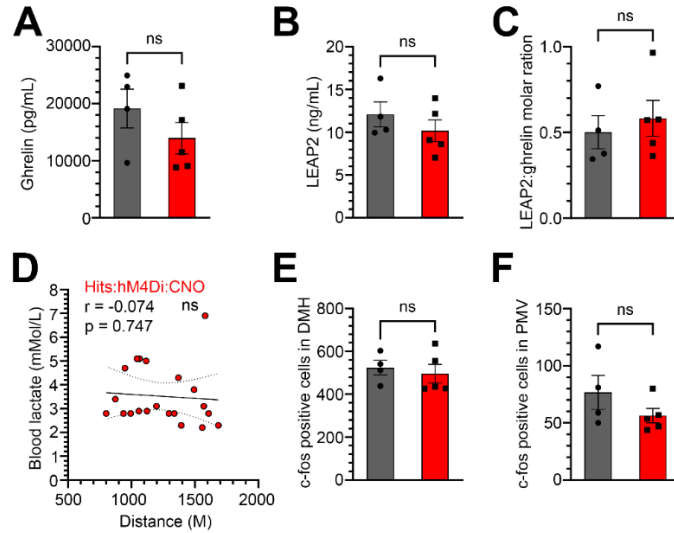

**Supplemental Figure 6**

**Supplemental Figure 6. Additional effects of inhibiting GHSR-expressing MBH neurons in mice submitted to an exercise endurance test.** Graphs showing effects of administration of CNO (0.3 mg/kg BW, i.p.) in hM4Di "hits" (n=5) vs. Cre-dependent mCherry control "hits" (n=4) on **A**, plasma ghrelin, **B**, plasma LEAP2, and **C**, plasma LEAP2:ghrelin molar ratio in exercised mice at exhaustion. **D**, Correlations between blood lactate with distance run during the exercise endurance test in CNO-treated hM4Di "hits" (n = 21, which includes the 5 hM4Di "hits" from this study and the 16 "hits" from Fig. 4). **E-F**, Numbers of c-fos-immunoreactive cells in the **E**, DMH and **F**, PMV of hM4Di "hits" (n=5) vs. Cre-dependent mCherry control "hits" (n =4) following CNO and the exercise endurance test. Data were analyzed by unpaired Student's t test (**A-C**, **E-F**) or by Pearson's correlation and simple linear regression analysis (**D**), whereby Pearson's correlation coefficient (r) and p values are indicated in the figure panels and whereby the solid lines represent the fitted linear regression curves and the dotted lines represent the s.e.m. ns - no statistically significant difference.
